# Supplementary material
Source: PubMed Central journal article supplement (PMC5826837)

## Supplemental data

Zhao et al

### PRMT1 and JMJD6 dependent arginine methylation regulate HNF4 $\alpha$ expression and hepatocyte proliferation

#### Supplemental Figure Legends

**Figure S1.** **A.** Western blot analysis of ADMA modified proteins in cell extracts of Huh 7.5 cells overexpressing wild type PRMT1. **B.** Alcohol inhibits PRMT1 dependent arginine methylation of SAM68. Western blot analysis of SAM68 immunoprecipitated from livers of wild type mice fed alcohol or control liquid diet using anti-methyl-arginine antibody or IgG as a negative control.

**Figure S2. Hepatocyte specific PRMT1 deletion results in an increase of serum ALT.** **A.** Serum ALT levels in PRMT1 flox/flox mice and PRMT1 flox/flox Albumin-Cre littermates. N=3 per group. **B.** Serum ALT levels and relative Gpt mRNA levels in PRMT1 flox/flox mice received  $5 \times 10^{10}$ -  $2 \times 10^{11}$  gc of AAV-Cre or AAV-control.

**Figure S3. PCR array analysis of genes differentially regulated in PRMT1 flox/flox mice and PRMT1 flox/flox Albumin-Cre mice.** **A.** Top 20 upregulated and down regulated genes. **B.** Ingenuity pathway analysis of upstream transcriptional regulators.

**Figure S4.** Western blot analysis of protein levels in the livers of wild type mice fed control liquid diet (pair fed) or alcohol diet (alcohol) for 10 days (A) or 3 weeks (B).

**Figure S5.** **A.** Chromatin immunoprecipitation using H4R3me2a antibodies or IgG as a negative control from livers of mice that received either AAV-control or AAV-Cre. Data are presented as mean  $\pm$ SD. N=3 \*p < 0.05. **B.** Relative mRNA levels in PRMT1 flox/flox mice received AAV-Cre or AAV-control for 12 weeks.

**Figure S6.** PRMT1 flox/flox mice after 3 weeks post injection of AAV8-TBG-Cre or AAV-control virus  $10^{11}$  gc/mouse followed by second injection of AAV8-GFP-U6-m-JMJD6-shRNA or AAV8-GFP-U6-scramb-shRNA  $2 \times 10^{11}$  gc/mouse. Representative images of immunohistochemical staining of PRMT1 (A) and JMJD6 (B) in the livers of these mice. C. Serum ALT levels in these mice. Data are presented as mean  $\pm$ SD. N=4-6 per group.

**Figure S7.** Wild type mice were injected  $2 \times 10^{11}$  gc/mouse AAV8-GFP-U6-m-JMJD6-shRNA or AAV8-GFP-U6-scramb-shRNA and fed control liquid diet (pair fed) or alcohol diet (alcohol) for 3 weeks. **A.** Western blot analysis of JMJD6 and HNF4 $\alpha$  protein expression levels in the livers of these mice **B.** Liver/body weight ratio in these mice. \*p < 0.05, \*\*\*p < 0.001,

n=4-6 per group. C. Serum ALT levels in these mice. Data are presented as mean  $\pm$ SD. N=4-6 per group.

**Figure S8** Relative PRMT1 protein levels in human HCC specimen. Data are presented as mean  $\pm$ SD. N=5 for donor samples N=7 for HCC (Tumor and Adjacent). \*p < 0.05.

Figure S1

**A**

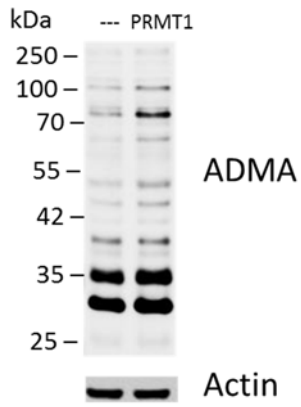

**B**

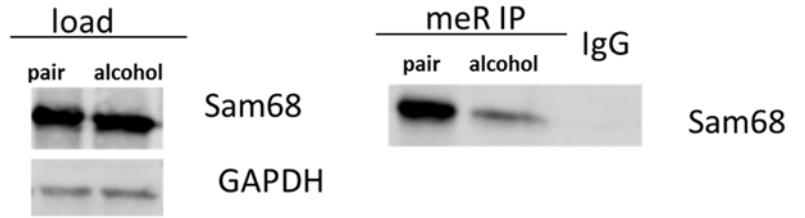

Figure S2

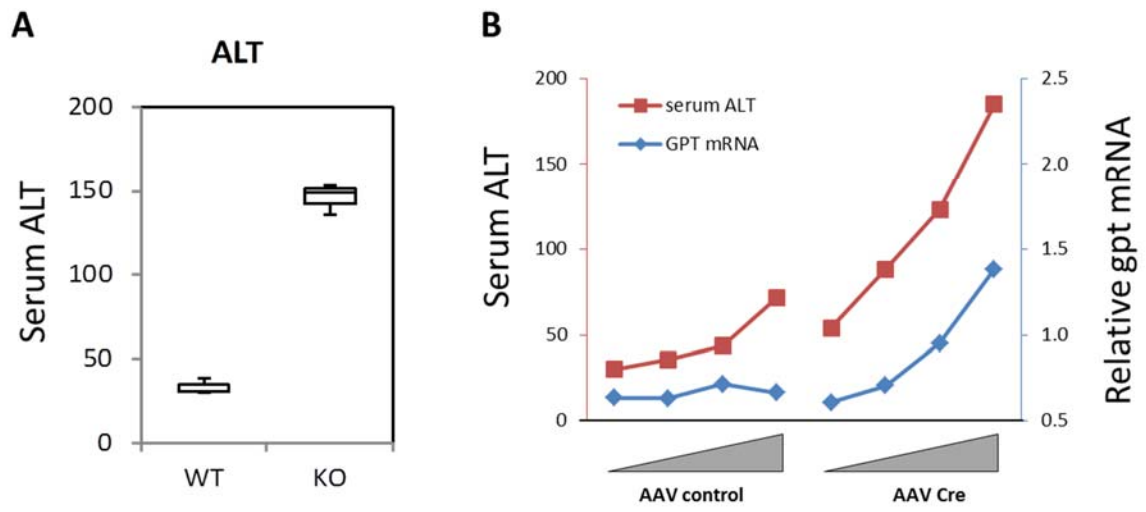

Figure S3

**A**

| Top 20 upregulated<br>In PRMT1 hepKO |      | Top 20 downregulated<br>In PRMT1 hepKO |       |
|--------------------------------------|------|----------------------------------------|-------|
| Gene                                 | log2 | Gene                                   | log2  |
| Wnt1                                 | 4.15 | Shh                                    | -6.11 |
| Ywhae                                | 3.46 | Cryab                                  | -1.19 |
| Melk                                 | 2.82 | Rad50                                  | -0.84 |
| Tubb2a                               | 2.75 | Prkce                                  | -0.79 |
| Ttk                                  | 2.44 | Nes                                    | -0.76 |
| Cdkn1a                               | 2.42 | Sirt1                                  | -0.75 |
| Ccnb1                                | 2.08 | Cdc45                                  | -0.74 |
| Btg2                                 | 1.86 | Mre11a                                 | -0.71 |
| Src                                  | 1.78 | Rictor                                 | -0.69 |
| Pbk                                  | 1.75 | Tlk1                                   | -0.69 |
| Aurkb                                | 1.73 | Cdh13                                  | -0.66 |
| Rrm2                                 | 1.63 | Cul4a                                  | -0.64 |
| Uhrf1                                | 1.62 | Ezh2                                   | -0.62 |
| Ccnb2                                | 1.59 | Rad17                                  | -0.62 |
| Ect2                                 | 1.56 | Med12                                  | -0.59 |
| Cdk1                                 | 1.52 | Kat2b                                  | -0.58 |
| Cdkn2a                               | 1.49 | Id4                                    | -0.58 |
| Ube2c                                | 1.49 | Brca2                                  | -0.57 |
| Foxm1                                | 1.44 | Prkaca                                 | -0.56 |
| Chek1                                | 1.38 | Smc1a                                  | -0.55 |
| Jun                                  | 1.37 |                                        |       |

**B**

Upstream transcriptional regulators

|        | Z-score | p-value  |
|--------|---------|----------|
| FOXO1  | 3.461   | 8.01E-17 |
| MITF   | 3.264   | 7.62E-11 |
| CCND1  | 3.051   | 4.15E-20 |
| CTNNB1 | 2.975   | 4.74E-07 |
| E2F1   | 2.858   | 2.30E-29 |
| FOXM1  | 2.646   | 4.43E-20 |
| MYC    | 2.546   | 1.12E-19 |
| RB1    | -2.935  | 7.98E-22 |
| CDKN2A | -2.445  | 3.46E-26 |
| KDM5B  | -2.309  | 4.29E-15 |
| TP53   | -2.265  | 4.64E-39 |
| IRF4   | -2.236  | 6.36E-05 |
| HDAC2  | -2.165  | 3.13E-05 |
| NUPR1  | -2.111  | 2.04E-07 |
| E2F6   | -2.000  | 9.16E-07 |
| NRIP1  | -2.000  | 9.16E-07 |
| HDAC1  | -1.951  | 2.56E-19 |
| HNF4A  | -1.941  | 1.10E-05 |

Figure S4

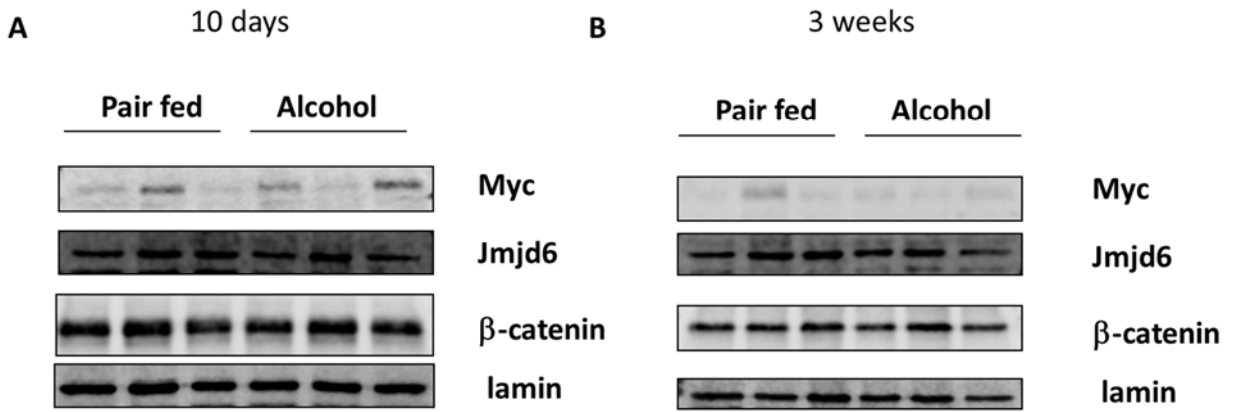

Figure S5

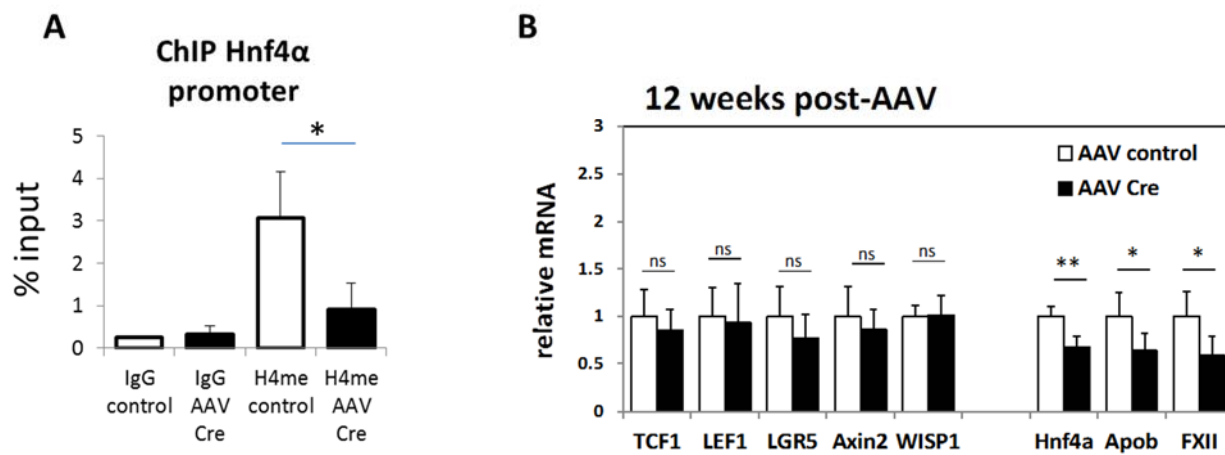

Figure S6

**A**

JMJD6 staining

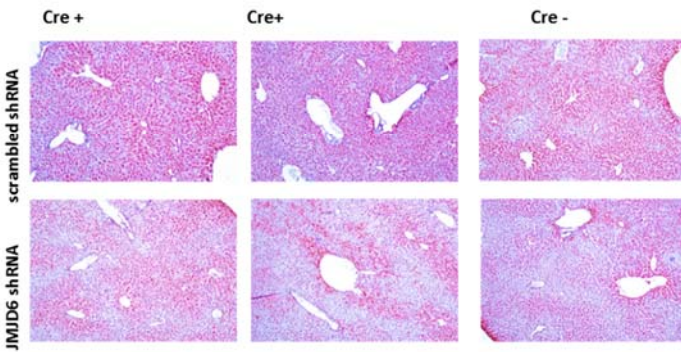

**B**

PRMT1 staining

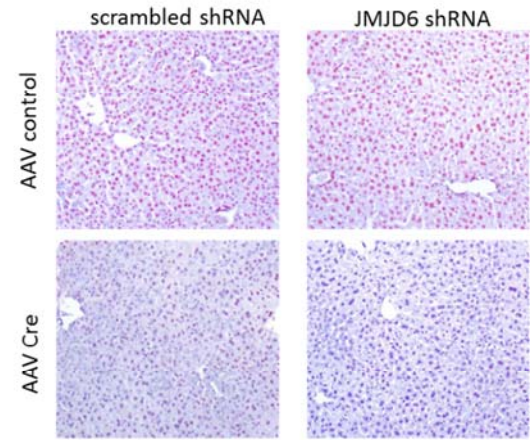

**C**

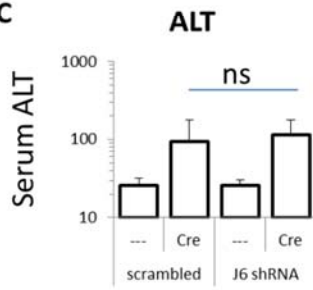



Figure S7

**A**

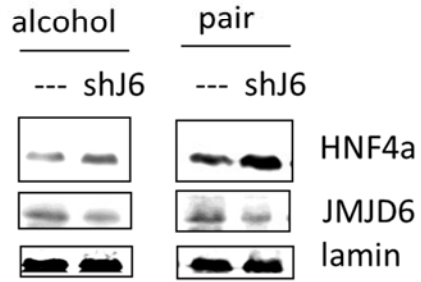

**B**

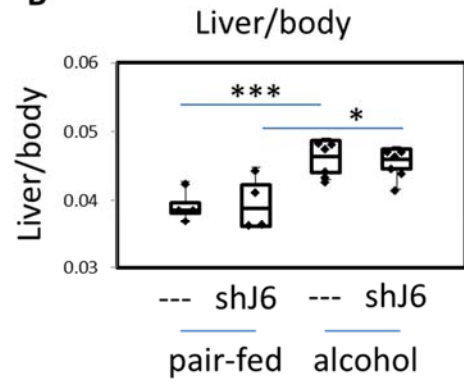

**C**

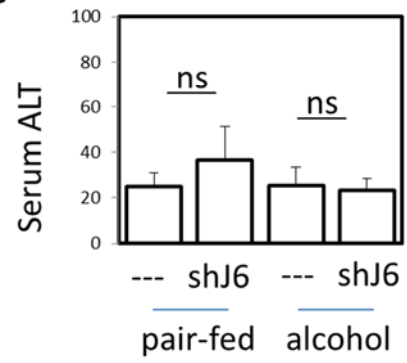

Figure S8

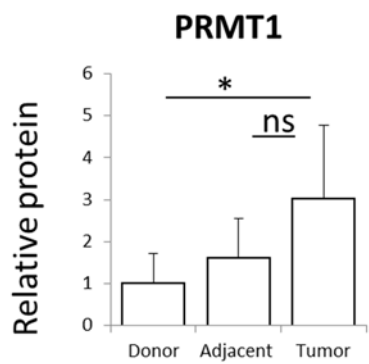

Supplement: NIHMS913349-supplement-Supp_info.pdf [file NIHMS913349-supplement-Supp_info.pdf]
